# Supplementary material for: A Time Bucket Formulation for the Traveling Salesman Problem with Time Windows
Source: Atypon-hosted journal article supplement (doi:10.1287/ijoc.1100.0432), 2010-12-30
Supplement: ijoc.1100.0432-sm-ec.pdf [file ijoc.1100.0432-sm-ec.pdf]

Online Supplement for  
A Time Bucket Formulation for the  
TSP with Time Windows

*INFORMS Journal on Computing*

Sanjeeb Dash, Oktay Günlük  
IBM T. J. Watson Research Center, Yorktown Heights, NY 10598,  
{sanjeebd@us.ibm.com, gunluk@us.ibm.com}

Andrea Lodi, Andrea Tramontani  
DEIS, University of Bologna, Bologna, Italy,  
{andrea.lodi@unibo.it, andrea.tramontani@unibo.it}

## A. A numerical example

As mentioned in Section 6.1.2, the LP relaxation value given by TBF plus bucket preprocessing can sometimes be stronger than the value given by TIF after bucket preprocessing. We next present a numerical example to demonstrate this.

Consider the following “toy” TSPTW instance with  $V = \{1, 2, \dots, 7\}$  and with time windows  $W_1 = [0, 0]$ ,  $W_2 = [1, 2]$ ,  $W_3 = [1, 2]$ ,  $W_4 = [5, 12]$ ,  $W_5 = [5, 9]$ ,  $W_6 = [5, 11]$ ,  $W_7 = [20, 20]$ . Assume the graph  $G = (V, A)$  to be complete. Traveling times are  $\theta_{ij} = 1$  for  $(i, j) \in A_1^\theta = \{(1, 2), (1, 3), (2, 3), (2, 6), (3, 2), (5, 4)\}$ ,  $\theta_{ij} = 3$  for  $(i, j) \in A_3^\theta = \{(2, 4), (3, 5), (4, 6)\}$ ,  $\theta_{ij} = 4$  for  $(i, j) = (3, 4)$  and  $\theta_{ij} = 2$  for all the other arcs. Traveling costs are  $c_{ij} = 0$  for  $(i, j) = (4, 6)$ ,  $c_{ij} = 1$  for  $(i, j) \in A_1^c = \{(1, 2), (2, 3), (3, 4), (3, 5), (4, 5), (4, 7), (5, 6), (5, 7), (6, 5), (6, 4), (6, 7)\}$  and  $c_{ij} = 2$  for all the other arcs. The triangle inequality holds for the traveling times  $\theta_{ij}$  but not for the costs  $c_{ij}$  because of the arc  $(4, 6)$  with cost zero.

The optimal tour is  $(1, 2, 3, 4, 5, 6, 7)$  where the nodes are visited at times  $t_1 = 0$ ,  $t_2 = 1$ ,  $t_3 = 2$ ,  $t_4 = 6$ ,  $t_5 = 8$ ,  $t_6 = 10$ ,  $t_7 = 20$ . The cost of the optimal tour is  $c_{opt} = 6$ . LP-TIF yields a lower bound  $c_{TIF}^* = 5.5$  that corresponds to the fractional solution  $x_{12} = x_{23} = 1$ ,  $x_{34} = x_{35} = x_{46} = x_{47} = x_{56} = x_{57} = x_{64} = x_{65} = 0.5$ . Note in particular that node 3 is visited at bucket  $[2, 2] \in B_3$  with  $z_3^{[2,2]} = 1$ , arc  $(3, 4)$  is used with  $x_{34} = 0.5$  and hence node 4 is visited at bucket  $[6, 6] \in B_4$  with  $z_4^{[6,6]} = 0.5$ . Thus, the arc  $(i, j) = (4, 6)$  with cost 0 can be used with  $x_{46} = 0.5$  because the bucket-arc  $(b, b') \in A_B$ ,  $b = [6, 6] \in B_4$ ,  $b' = [9, 9] \in B_6$  is used with  $y_{46}^{[6,6]} = 0.5$ .

Now consider a time bucket relaxation where nodes 2 and 3 have only one bucket, i.e.

$B_2 = \{[1, 2]\}$  and  $B_3 = \{[1, 2]\}$ , while the time windows of all the other nodes are completely discretized as in TIF. With this choice of the buckets, LP-TBR yields the same lower bound as TIF,  $c_{TBR}^* = 5.5$ , that corresponds exactly to the same fractional  $x$  solution. In this case, node 3 is visited at bucket  $[1, 2] \in B_3$  with  $z_3^{[1,2]} = 1$ , arc  $(3, 4)$  is used with  $x_{34} = 0.5$  and hence node 4 is visited at bucket  $[5, 5] \in B_4$  (instead of  $[6, 6]$ ) with  $z_4^{[5,5]} = 0.5$ , because of the negative waiting time introduced by the bucket  $[1, 2] \in B_3$ . Thus, the arc  $(i, j) = (4, 6)$  with cost 0 is again used with  $x_{46} = 0.5$ , because the bucket-arc  $(b, b') \in A_B$ ,  $b = [5, 5] \in B_4$ ,  $b' = [8, 8] \in B_6$  can be used with  $y_{46}^{[5,5]} = 0.5$ .

However, if we apply the so-called bucket preprocessing to the above TIF and TBR, then the bucket-arc  $(b, b') \in A_B$ ,  $b = [5, 5] \in B_4$ ,  $b' = [8, 8] \in B_6$  is removed, since for node  $k = 5$  we have  $b \prec k$  and  $r_b + \theta_{46} + \theta_{65} > D_k$ . Thus, the lower bound yielded by LP-TBR improves to  $c_{TBR}^* = 6$ , that corresponds to the optimal tour  $(1, 2, 3, 4, 5, 6, 7)$ , while the optimal solution of LP-TIF does not change, since the bucket-arc  $(b, b') \in A_B$ ,  $b = [6, 6] \in B_4$ ,  $b' = [9, 9] \in B_6$  is not removed by the bucket preprocessing.

## B. Proofs of Propositions 1 and 4

**Proof. (Proposition 1)** Let  $(x, y, z)$  be a feasible solution of the LP relaxation of TIF. Let  $s \in \mathbb{R}^{|V|}$  be defined as

$$s_i = \sum_{t \in W_i} t z_i^t \text{ for all } i \in V.$$

We next show that  $(x, s)$  is a feasible solution of the LP relaxation of BMF; the proposition will follow.

Firstly, (2) holds as

$$\sum_{j \in V^+(i)} x_{ij} = \sum_{j \in V^+(i)} \sum_{t \in W_i} y_{ij}^t = \sum_{t \in W_i} \sum_{j \in V^+(i)} y_{ij}^t = \sum_{t \in W_i} z_i^t = 1.$$

The first equality above is implied by (10), the third equality by (8) and the last one by (7).

To see that (3) holds, note that

$$\sum_{k \in V^-(i)} x_{ki} = \sum_{k \in V^-(i)} \sum_{t \in W_k} y_{ki}^t = \sum_{k \in V^-(i)} \sum_{t' \in W_i} \sum_{t \in I_k(i, t')} y_{ki}^t = \sum_{t' \in W_i} z_i^{t'} = 1$$

where the last two equalities are implied by equations (8) and (9), respectively.

The constraints (5) are clearly satisfied by  $s$ . We now show that the constraints (4) are satisfied by  $(x, s)$ . Let  $\bar{z}_i^t = z_i^t - y_{ij}^t$ . Then

$$\sum_{t \in W_i} \bar{z}_i^t = \sum_{t \in W_i} z_i^t - \sum_{t \in W_i} y_{ij}^t = 1 - x_{ij}$$

by equations (7) and (10). Therefore

$$\begin{aligned} s_i &= \sum_{t \in W_i} tz_i^t = \sum_{t \in W_i} t\bar{z}_i^t + \sum_{t \in W_i} ty_{ij}^t \\ &\leq D_i \sum_{t \in W_i} \bar{z}_i^t + \sum_{t \in W_i} ty_{ij}^t = D_i(1 - x_{ij}) + \sum_{t \in W_i} ty_{ij}^t. \end{aligned} \tag{a}$$

Now, using the fact that  $M_{ij} = D_i + \theta_{ij} - R_j$ , we have

$$s_i + \theta_{ij} - (1 - x_{ij})M_{ij} = s_i + \theta_{ij}x_{ij} - (1 - x_{ij})(D_i - R_j).$$

The inequality in (a) and (10) imply that the last term above is less than or equal to

$$R_j(1 - x_{ij}) + \theta_{ij}x_{ij} + \sum_{t \in W_i} ty_{ij}^t = R_j(1 - x_{ij}) + \sum_{t \in W_i} (t + \theta_{ij})y_{ij}^t.$$

Similarly, writing  $\bar{z}^\tau = z^\tau - \sum_{t \in I_i(j, \tau)} y_{ij}^t$ , we have  $\sum_{\tau \in W_j} \bar{z}^\tau = 1 - x_{ij}$ . Further

$$\begin{aligned} s_j &= \sum_{\tau \in W_j} \tau z_j^\tau = \sum_{\tau \in W_j} \tau \bar{z}^\tau + \sum_{\tau \in W_j} \tau \sum_{t \in I_i(j, \tau)} y_{ij}^t &\geq R_j(1 - x_{ij}) + \sum_{\tau \in W_j} \tau \sum_{t \in I_i(j, \tau)} y_{ij}^t \\ &\geq R_j(1 - x_{ij}) + \sum_{t \in W_i} (t + \theta_{ij})y_{ij}^t. \end{aligned}$$

□

**Proof. (Proposition 4)** As discussed earlier, a feasible solution to TBF corresponds to a directed path in  $G'$  that starts with a bucket in  $B_p$ , ends at a bucket in  $B_q$  and visits exactly one bucket associated with the remaining nodes. As  $B_t \subseteq B$  for some  $t \in V$  and  $B_p \cup B_q \subseteq \bar{B}$  by assumption, the path must start at one of the buckets in  $\bar{B}$ , must visit one of the buckets in  $B$  and must end at one of the buckets in  $\bar{B}$ . Therefore, the path must use an arc in  $\delta(\bar{B})$  and an arc in  $\delta(B)$  at least once. Let  $(b, b')$  be the last arc on the path that crosses from  $B$  to  $\bar{B}$  and let  $b \in B_i$  and  $b' \in B_j$ . Notice that  $b$  and  $b' \notin \pi(B)$ . If  $b \in \pi(B)$ , then there is a node  $k$  with  $B_k \subseteq B$  such that  $b \prec k$ , which means that some bucket of  $B_k$  is visited after  $b$ , a contradiction. The same argument holds for  $b'$ . Therefore  $(b, b') \in \delta_\pi(B)$  and the inequality (25) is valid. One can similarly argue that if  $(b, b')$  is the first arc crossing from  $\bar{B}$  to  $B$  in a feasible solution to TBF, then  $b, b' \notin \sigma(B)$ . Therefore inequality (26) is valid.

To see that the  $\pi_B$ -inequalities dominate the  $\pi$ -inequalities, consider the  $\pi$ -inequality (22) with  $S \subseteq V \setminus \{p, q\}$ . Recall that  $B(S) = \cup_{i \in S} B_i$ . Define  $X$  to be  $\delta(B(S) \setminus B(\pi(S)), B(\bar{S}) \setminus B(\pi(S)))$ . Now the left-hand side of the  $\pi$ -inequality can be written as

$$\sum_{(i,j) \in \delta_\pi(S)} x_{ij} = \sum_{(i,j) \in \delta_\pi(S)} \sum_{b \in B_i} y_{ij}^b = \sum_{(i,j,b) \in \mu(X)} y_{ij}^b.$$

Let  $Y = \delta(B(S) \setminus \pi(B(S)), B(\bar{S}) \setminus \pi(B(S)))$ ; then the  $\pi_B$ -inequality with  $B$  replaced by  $B(S)$  is

$$\sum_{(i,j,b) \in \mu(Y)} y_{ij}^b \geq 1.$$

As  $B(\pi(S)) \subseteq \pi(B(S))$ , it follows that  $Y$  is contained in  $X$  and

$$\sum_{(i,j,b) \in \mu(X)} y_{ij}^b \geq \sum_{(i,j,b) \in \mu(Y)} y_{ij}^b.$$

Therefore the  $\pi_B$ -inequalities dominate the  $\pi$ -inequalities. The proof of domination in the case of  $\sigma_B$ -inequalities is very similar.  $\square$

## C. Table 1: detailed numbers.

Table 1: Time Bucket Formulation on the “easy” instances.

| Prob.     | V   | A    | AFG   |        |        | Time Bucket Formulation (TBF) |        |      |
|-----------|-----|------|-------|--------|--------|-------------------------------|--------|------|
|           |     |      | %rLB  | #nodes | CPU    | %rLB                          | #nodes | CPU  |
| rbg010a   | 12  | 54   | 99.3  | 2      | 0.1    | 100.0                         | 1      | 0.0  |
| rbg016a   | 18  | 79   | 98.9  | 2      | 0.2    | 100.0                         | 0      | 0.0  |
| rbg016b   | 18  | 167  | 93.7  | 76     | 8.8    | 97.2                          | 2      | 0.2  |
| rbg017.2  | 17  | 200  | 100.0 | 0      | 0.0    | 100.0                         | 0      | 0.0  |
| rbg017a   | 19  | 176  | 100.0 | 0      | 0.1    | 100.0                         | 0      | 0.0  |
| rbg017    | 17  | 122  | 100.0 | 4      | 0.8    | 99.3                          | 0      | 0.0  |
| rbg019a   | 21  | 71   | 100.0 | 0      | 0.0    | 100.0                         | 0      | 0.0  |
| rbg019b   | 21  | 211  | 98.9  | 820    | 54.6   | 99.5                          | 1      | 0.3  |
| rbg019c   | 21  | 229  | 95.8  | 58     | 8.7    | 96.8                          | 42     | 0.9  |
| rbg019d   | 21  | 156  | 99.7  | 2      | 0.8    | 100.0                         | 6      | 0.2  |
| rbg020a   | 22  | 95   | 100.0 | 0      | 0.2    | 100.0                         | 0      | 0.0  |
| rbg021.2  | 21  | 237  | 100.0 | 0      | 0.2    | 100.0                         | 0      | 0.1  |
| rbg021.3  | 21  | 256  | 97.8  | 340    | 27.2   | 98.4                          | 62     | 2.7  |
| rbg021.4  | 21  | 264  | 98.9  | 72     | 5.8    | 100.0                         | 1      | 0.2  |
| rbg021.5  | 21  | 268  | 98.8  | 76     | 6.6    | 100.0                         | 1      | 0.3  |
| rbg021.6  | 21  | 358  | 99.3  | 2      | 1.4    | 100.0                         | 1      | 0.3  |
| rbg021.7  | 21  | 375  | 96.2  | 24     | 4.3    | 100.0                         | 0      | 0.6  |
| rbg021.8  | 21  | 380  | 97.7  | 254    | 17.4   | 98.5                          | 10     | 1.4  |
| rbg021.9  | 21  | 380  | 97.0  | 320    | 26.1   | 98.5                          | 23     | 2.8  |
| rbg021    | 21  | 229  | 95.8  | 58     | 8.8    | 96.8                          | 42     | 0.9  |
| rbg027a   | 29  | 479  | 99.3  | 6      | 2.3    | 99.3                          | 2      | 1.4  |
| rbg031a   | 33  | 388  | 100.0 | 0      | 1.7    | 100.0                         | 0      | 0.2  |
| rbg033a   | 35  | 421  | 100.0 | 0      | 1.9    | 99.8                          | 6      | 0.9  |
| rbg034a   | 36  | 535  | 99.5  | 2      | 1.0    | 100.0                         | 6      | 1.9  |
| rbg035a.2 | 37  | 940  | 95.2  | 96     | 64.8   | 100.0                         | 3      | 5.3  |
| rbg035a   | 37  | 477  | 100.0 | 0      | 1.8    | 100.0                         | 2      | 0.2  |
| rbg038a   | 40  | 486  | 100.0 | 13204  | 4232.2 | 100.0                         | 9      | 1.5  |
| rbg040a   | 42  | 539  | 92.0  | 1756   | 751.8  | 96.6                          | 25     | 3.6  |
| rbg050a   | 52  | 1629 | 100.0 | 6      | 18.6   | 100.0                         | 2      | 24.5 |
| rbg055a   | 57  | 765  | 99.9  | 2      | 6.4    | 100.0                         | 19     | 3.5  |
| rbg067a   | 69  | 843  | 99.9  | 2      | 6.0    | 100.0                         | 23     | 3.6  |
| rbg125a   | 127 | 1824 | 99.5  | 56     | 229.8  | 100.0                         | 8      | 9.6  |
| avg.      |     |      | 98.5  | 538.8  | 171.6  | 99.4                          | 9.3    | 2.1  |
| geom.     |     |      | 98.5  | 13.6   | 3.0    | 99.4                          | 3.5    | 0.2  |
